# Supplementary material for: AIPE-active platinum(ii) complexes with tunable photophysical properties and their application in constructing thermosensitive probes used for intracellular temperature imaging
Source: Royal Society of Chemistry journal article supplement (doi:10.1039/c9tc01905g), 2019-01-01
Supplement: c9tc01905g1.pdf [file c9tc01905g1.pdf]

## Supplementary Information for

### **AIPE-active platinum(II) complexes with tunable photophysical properties and the application in constructing thermosensitive probes used for intracellular temperature imaging**

Shengheng Lin,<sup>‡a</sup> Honghao Pan,<sup>‡a</sup> Lin Li,<sup>a</sup> Rui Liao,<sup>a</sup> Shengzhen Yu,<sup>a</sup> Qiang Zhao,<sup>c</sup> Huibin Sun,<sup>\*a</sup> Wei Huang,<sup>\*a,b,c</sup>

<sup>a</sup> China Key Laboratory of Flexible Electronics (KLOFE) & Institute of Advanced Materials (IAM), Jiangsu National Synergistic Innovation Center for Advanced Materials (SICAM), Nanjing Tech University (NanjingTech), 30 South Puzhu Road, Nanjing 211816, P.R. China. E-mail: iamhbsun@njtech.edu.cn; iamwhuang@njtech.edu.cn

<sup>b</sup> Shaanxi Institute of Flexible Electronics (SIFE), Northwestern Polytechnical University (NPU), 127 West Youyi Road, Xi'an 710072, China

<sup>c</sup> Key Laboratory for Organic Electronics and Information Displays & Institute of Advanced Materials (IAM), SICAM, Nanjing University of Posts & Telecommunications, 9 Wenyuan Road, Nanjing 210023, P.R. China.

<sup>‡</sup> They contributed to this work equally.

## Experimental Section

### Synthetic route to AIPE-active platinum(II) complexes

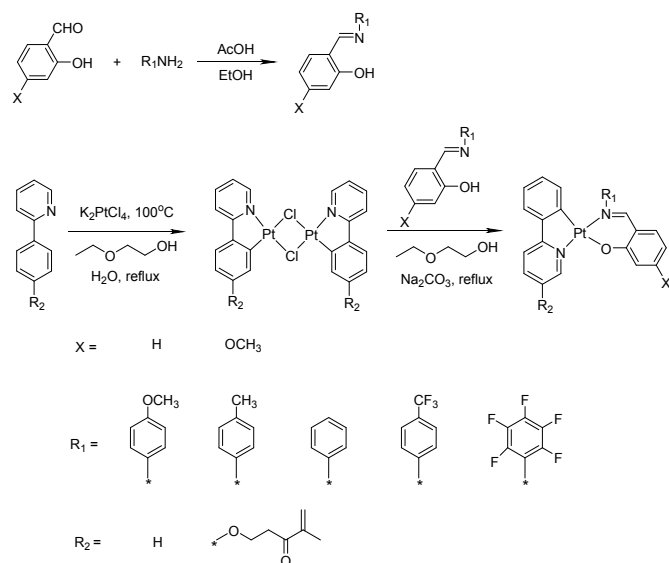

### General syntheses of Schiff base ligands.

Salicylaldehyde (22.0 mmol) was added to an EtOH solution (40 mL) of aniline (22.0 mmol). A drop of acetic acid as a catalyst was added to the reaction solution, and then the reaction mixture was stirred at room temperature for 3 hr. Finally, concentration and subsequent silica gel column purification gave yellow solid (19.8 mmol, 94% yield). All the other ligands were synthesized by the same method to give yellow powder or liquid. The yields of these Schiff base ligands were quantitative (> 90%).

### General syntheses of Pt(II) $\mu$ -dichloro-bridged dimers

Pt(II) $\mu$ -dichloro-bridged dimers were synthesized from the starting materials of K<sub>2</sub>PtCl<sub>4</sub> and C<sup>N</sup> ligands, K<sub>2</sub>PtCl<sub>4</sub>(415 mg, 1 mmol) and ppy (2.5 mmol) were dissolved in a mixed solvent of 2-ethoxyethanol and water(v/v = 3/1), the reaction mixture was heated at 80°C for 20 - 24 hours. The reaction solution was poured into an appropriate amount of water and filtered to obtain a green powder.

### General syntheses of Pt(II) complexes

All Pt(II) complexes were prepared by the same procedure according to the literature. A solution of Pt(II)-dichloro-bridged dimers, 3 equiv of the Schiff base ligand and 5 equiv of Na<sub>2</sub>CO<sub>3</sub> in 2-ethoxyethanol was heated to 100°C for 16 hr. Then the reaction mixture was filtered and subsequently concentrated under reduced pressure. The obtained crude product was purified by silica gel column chromatography using dichloromethane and PE as the eluent to give pure products with moderate yield (30% to 57%).

## **<sup>1</sup>H NMR and MALDI-TOF-MS Characterization of Pt(II) Complexes**

**1a.** Yield: 57%. <sup>1</sup>H NMR (400 MHz, CDCl<sub>3</sub>): δ (ppm) = 9.55 (d, J = 5.02 Hz, 1H), 8.21 (s, 1H), 7.8 (t, J = 6.30 Hz, 1H), 7.62 (d, J = 6.02 Hz, 1H), 7.52 (m, 2H), 7.45 (t, J = 6.80 Hz, 1H), 7.38 (M, 1H), 7.31 (m, 2H), 7.23 (m, 1H), 7.08 (d, J = 8.55 Hz, 1H), 6.91 (m, J = 6.20 Hz, 2H) 6.86 (t, J = 6.88 Hz, 1H), 6.56 (m, 2H), 5.68 (d, J = 7.08 Hz, 1H), 3.85 (s, 3H). MS (MALDI-TOF/TOF): m/z 575.69.

**1b.** Yield: 53%. <sup>1</sup>H NMR (400 MHz, CDCl<sub>3</sub>): δ (ppm) = 9.55 (d, J = 5.02 Hz, 1H), 8.21 (s, 1H), 7.8 (t, J = 6.30 Hz, 1H), 7.62 (d, J = 6.02 Hz, 1H), 7.52 (m, 2H), 7.43 (d, J = 6.80 Hz, 1H), 7.38 (d, 1H), 7.30 (d, 1H), 7.23 (m, 3H), 7.08 (d, J = 8.55 Hz, 1H), 6.86 (t, J = 6.88 Hz, 1H), 6.56 (m, 2H), 5.76 (d, J = 7.08 Hz, 1H), 2.42 (s, 3H). MS (MALDI-TOF/TOF): m/z 558.96.

**1c.** Yield: 44%. <sup>1</sup>H NMR (400 MHz, CDCl<sub>3</sub>): δ (ppm) = 9.55 (d, J = 5.02 Hz, 1H), 8.25 (s, 1H), 7.8 (t, J = 6.30 Hz, 1H), 7.6 (m, 3H), 7.47 (t, J = 6.80 Hz, 1H), 7.39 (m, 3H), 7.31 (m, 2H), 7.23 (m, 1H), 7.08 (d, J = 8.55 Hz, 1H), 6.86 (t, J = 6.88 Hz, 1H), 6.56 (m, 2H), 5.68 (d, J = 7.08 Hz, 1H). MS (MALDI-TOF/TOF): m/z 546.17.

**1d.** Yield: 42%. <sup>1</sup>H NMR (400 MHz, CDCl<sub>3</sub>): δ (ppm) = 9.52 (d, J = 4.50 Hz, 1H), 8.24 (s, 1H), 7.83 (t, J = 5.40 Hz, 1H), 7.73 (d, J = 6.30 Hz, 2H), 7.65 (m, 3H), 7.5 (m, 1H), 7.37 (d, J = 6.00 Hz, 1H), 7.31 (m, 1H), 7.25 (d, J = 6.60 Hz, 1H), 7.09 (d, J = 6.30 Hz, 1H), 6.87 (t, J = 5.4 Hz, 1H), 6.59 (m, 2H), 5.63 (d, J = 5.40 Hz, 1H). MS (MALDI-TOF/TOF): m/z 613.07.

**1e.** Yield: 55%. <sup>1</sup>H NMR (400 MHz, CDCl<sub>3</sub>): δ (ppm) = 9.47 (d, J = 4.75 Hz, 1H), 8.11 (s, 1H), 7.8 (t, J = 6.30 Hz, 1H), 7.63 (d, J = 6.02 Hz, 1H), 7.57 (t, J = 5.12 Hz, 1H), 7.42 (d, J = 5.70 Hz, 1H), 7.28 (M, 1H), 7.23 (t, J = 5.72 Hz, 1H), 7.07 (d, J = 6.22 Hz, 1H), 6.96 (t, J = 5.70 Hz, 1H) 6.77 (t, J = 5.70 Hz, 1H), 6.594 (t, J = 6.02 Hz, 1H), 5.67 (d, J = 6.02 Hz, 1H). MS (MALDI-TOF/TOF): m/z 634.99.

**2a.** Yield: 63%. <sup>1</sup>H NMR (400 MHz, CDCl<sub>3</sub>): δ (ppm) = 9.55 (d, J = 5.02 Hz, 1H), 8.06 (s, 1H), 7.8 (t, J = 6.30 Hz, 1H), 7.63 (d, J = 6.02 Hz, 1H), 7.47 (m, 2H), 7.37 (d, J = 4.8 Hz, 1H), 7.24 (m, 1H), 7.18 (d, J = 4.8 Hz, 1H), 6.90 (m, 3H), 6.63 (m, 1H), 6.55 (d, J = 2.1 Hz, 1H), 6.25 (m, 1H). 5.82 (d, J = 6.02 Hz, 1H), 3.86 (s, 3H), 3.84 (s, 3H). MS (MALDI-TOF/TOF): m/z 605.18.

**2b.** Yield: 45%. <sup>1</sup>H NMR (400 MHz, CDCl<sub>3</sub>): δ (ppm) = 9.55 (d, J = 4.20 Hz, 1H), 8.06 (s, 1H), 7.8 (t, J = 5.70 Hz, 1H), 7.63 (d, J = 6.00 Hz, 1H), 7.43 (d, J = 6.00 Hz, 2H), 7.36 (d, J = 6.00 Hz, 1H), 7.23 (m, 1H), 7.17 (m, 3H), 6.87 (t, J = 5.70 Hz, 1H), 6.54 (m, 2H), 6.25 (m, 1H), 5.78 (d, J = 6.00 Hz, 1H), 3.87 (s, 3H), 2.41 (s, 3H). MS (MALDI-TOF/TOF): m/z 589.06.

**2c.** Yield: 37%. <sup>1</sup>H NMR (400 MHz, CDCl<sub>3</sub>): δ (ppm) = 9.55 (d, J = 4.20Hz, 1H), 8.09 (s, 1H), 7.80 (t, J = 5.10 Hz, 1H), 7.63 (d, J = 6.00 Hz, 1H), 7.56 (d, J = 5.40 Hz, 2H), 7.38 (t, J = 5.40 Hz, 3H), 7.29 (d, J = 6.00 Hz, 1H), 7.24 (m, 1H), 7.17 (d, J = 6.6 Hz, 1H), 6.86 (t, J = 6.00 Hz, 1H), 6.55 (m, 2H), 6.26 (m, 1H), 5.70 (d, J = 6.00 Hz, 1H), 3.87 (s, 3H). MS (MALDI-TOF/TOF): m/z 574.79.

**2d.** Yield: 29%. <sup>1</sup>H NMR (400 MHz, CDCl<sub>3</sub>): δ (ppm)= 9.55 (d, J = 4.20Hz, 1H), 8.09 (s, 1H), 7.84 (t, J = 5.10 Hz, 1H), 7.69 (d, J = 6.00 Hz, 2H), 7.65 (m, 3H), 7.37 (d, J = 6.00 Hz, 1H), 7.24 (m, 1H), 7.17 (d, J = 6.60 Hz, 1H), 6.87 (t, J = 5.7 Hz, 1H), 6.54 (m, 2H), 6.27 (d, J = 6.60 Hz, 1H), 5.65 (d, J = 6.00 Hz, 1H), 3.87 (s, 3H). MS (MALDI-TOF/TOF): m/z 642.86.

**2e.** Yield: 41%. <sup>1</sup>H NMR (400 MHz, CDCl<sub>3</sub>): δ (ppm) = 9.50 (d, J = 4.20Hz, 1H), 7.88 (s, 1H), 7.81 (t, J = 5.70 Hz, 1H), 7.64 (d, J = 6.00 Hz, 1H), 7.43 (d, J = 6.00 Hz, 1H), 7.23 (m, 1H), 7.12 (d, J = 6.60 Hz, 1H), 6.97 (t, J = 5.7 Hz, 1H), 6.77 (t, J = 5.10 Hz, 1H). 6.49 (d, J = 1.8Hz, 1H). 6.27 (m, 1H), 5.67 (d, J = 6.00 Hz, 1H), 3.88 (s, 3H). MS (MALDI-TOF/TOF): m/z 664.89.

**AIPE-active Monomer:** Yield: 30% <sup>1</sup>H NMR (400 MHz, DMSO-d<sub>6</sub>): δ (ppm) = 9.36 (d, 1H), 8.61 (s, 1H), 8.02 (d, 1H), 7.96 (d, 2H), 7.87 (d, 3H), 7.61 (d, 1H), 7.52 (m, 2H), 7.42 (t, 1H), 7.03 (d, 1H), 6.64 (t, 1H), 6.48 (d, 1H), 6.04 (s, 1H), 5.73 (m, 1H), 5.24 (d, 1H), 4.26 (m, 2H), 3.55 (m, 2H), δ = 1.91 (s, 3H). MS (MALDI-TOF/TOF): m/z 741.52.

### Synthetic route to phosphorescent temperature sensitive probes

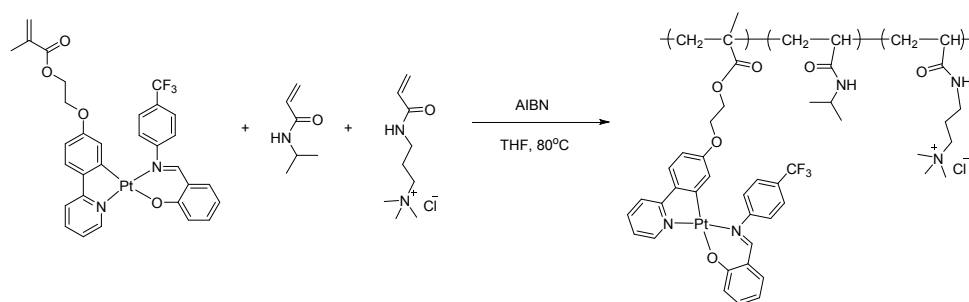

**P1:** N-isopropylacrylamide (135mg, 1.2 mmol), APTMA chloride (30 μL, 106.5 μmol), AIPE-active Monomer (20 mg, 27 μmol) and 2,2-azobisisobutyronitrile (2 mg, 12.2 μmol) were dissolved in THF (5 mL). The solution was bubbled with dry nitrogen for 45 min to remove dissolved oxygen, and the solution was heated to 80°C for 12 h. After cooling to room temperature, the reaction mixture was poured into diethyl ether (200 mL), and the obtained **P1** was purified by reprecipitation using methanol/diethyl ether (5 mL/250 mL) and dialysis. GPC (THF, polystyrene standard): M<sub>n</sub> = 3539, M<sub>w</sub> = 4428, M<sub>w</sub>/M<sub>n</sub> = 1.25.

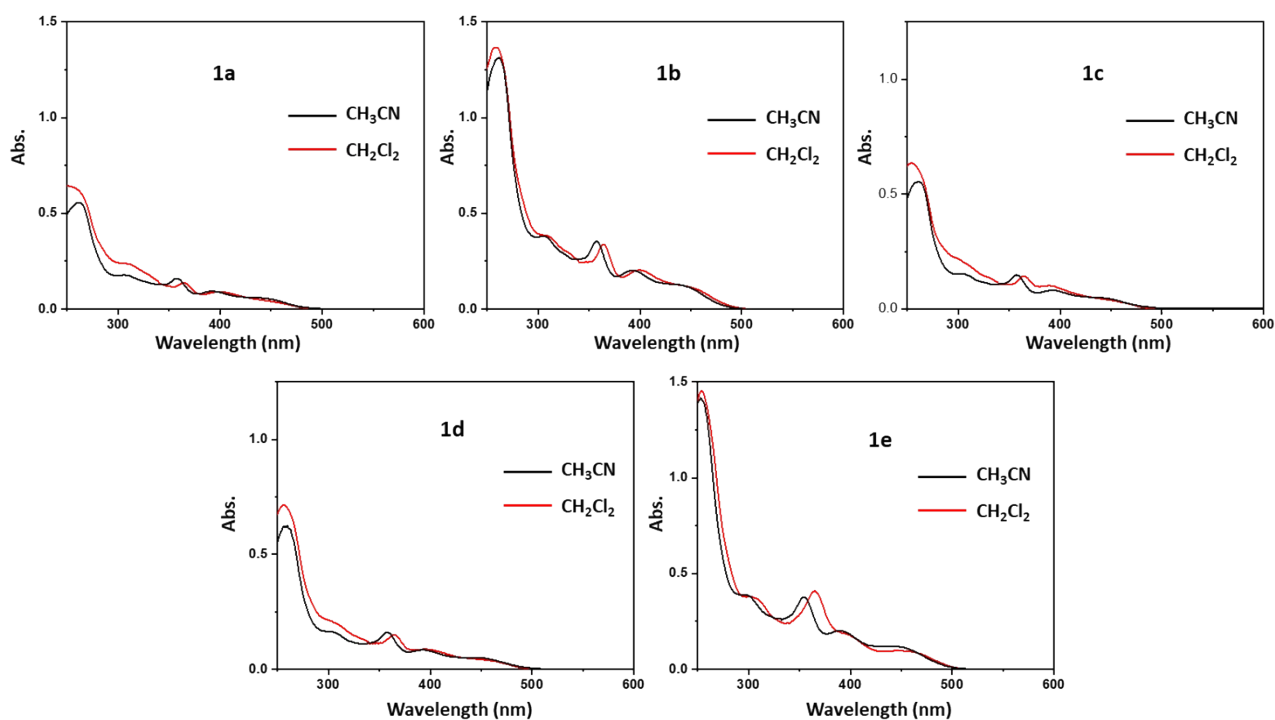

**Fig. S1.** UV-vis absorption spectra of complexes **1** in  $\text{CH}_3\text{CN}$  and  $\text{CH}_2\text{Cl}_2$ .

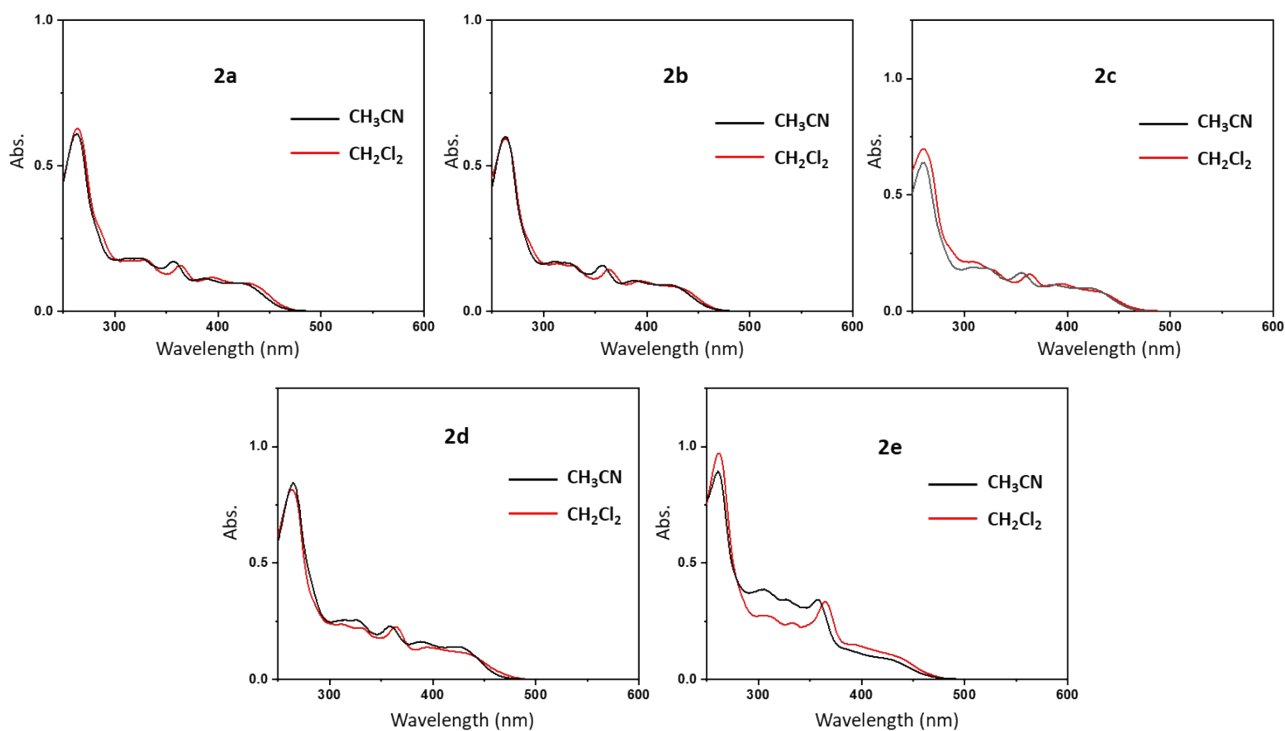

**Fig. S2.** UV-vis absorption spectra of complexes **2** in  $\text{CH}_3\text{CN}$  and  $\text{CH}_2\text{Cl}_2$ .

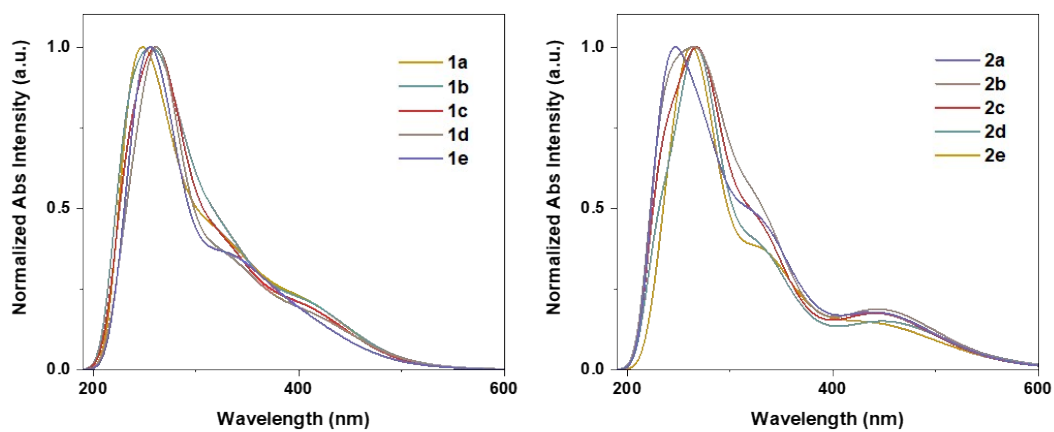

f

**Fig. S3.** Calculated absorption spectra of all complexes at room temperature in  $\text{CH}_2\text{Cl}_2$  solution.

**Table S1** HOMOs and LUMOs distributions of complexes **1** at the lowest singlet state.

| Complexes | HOMO-1                                                                              | HOMO                                                                                | LUMO                                                                                 | LUMO+1                                                                                |
|-----------|-------------------------------------------------------------------------------------|-------------------------------------------------------------------------------------|--------------------------------------------------------------------------------------|---------------------------------------------------------------------------------------|
| <b>1a</b> | 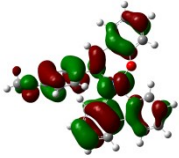   |    |    |    |
| <b>1b</b> |    |    |    |    |
| <b>1c</b> |   |   |   |   |
| <b>1d</b> |  |  |  |  |
| <b>1e</b> |  |  |  |  |

**Table S2** HOMOs and LUMOs distributions of complexes **2** at the lowest singlet state.

| Complexes | HOMO-1                                                                              | HOMO                                                                                | LUMO                                                                                 | LUMO+1                                                                                |
|-----------|-------------------------------------------------------------------------------------|-------------------------------------------------------------------------------------|--------------------------------------------------------------------------------------|---------------------------------------------------------------------------------------|
| 2a        | 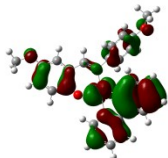   |    |    |    |
| 2b        |    |    |    |    |
| 2c        |   |   |   |   |
| 2d        |  |  |  |  |
| 2e        |  |  |  |  |



**Table S3** Absorption of all complexes in CH<sub>2</sub>Cl<sub>2</sub> solution from TDDFT Calculations.

| Complex | states | $\lambda$<br>(nm) | E<br>(eV) | oscillator | main configurations<br>(CI coeff) | assignment |
|---------|--------|-------------------|-----------|------------|-----------------------------------|------------|
| 1a      | S1     | 430               | 2.88      | 0.0628     | HOMO→LUMO (0.69)                  | LC/MLCT    |
|         | S2     | 404               | 3.07      | 0.1177     | HOMO→LUMO+1 (0.68)                | LLCT/ILCT  |
|         | S3     | 357               | 3.47      | 0.1154     | HOMO-1→LUMO (0.64)                | MLCT/LLCT  |
| 1b      | S1     | 430               | 2.88      | 0.0562     | HOMO→LUMO (0.69)                  | LC/MLCT    |
|         | S2     | 404               | 3.07      | 0.1079     | HOMO→LUMO+1 (0.68)                | LLCT/ILCT  |
|         | S3     | 355               | 3.49      | 0.1067     | HOMO-1→LUMO (0.65)                | MLCT/LLCT  |
| 1c      | S1     | 429               | 2.89      | 0.0510     | HOMO→LUMO (0.70)                  | LC/MLCT    |
|         | S2     | 403               | 3.08      | 0.1034     | HOMO→LUMO+1 (0.68)                | LLCT/ILCT  |
|         | S3     | 354               | 3.50      | 0.1078     | HOMO-1→LUMO (0.65)                | MLCT/LLCT  |
| 1d      | S1     | 436               | 2.84      | 0.0567     | HOMO→LUMO (0.70)                  | LC/MLCT    |
|         | S2     | 405               | 3.06      | 0.1004     | HOMO→LUMO+1 (0.68)                | LLCT/ILCT  |
|         | S3     | 355               | 3.49      | 0.1168     | HOMO-1→LUMO (0.62)                | MLCT/LLCT  |
| 1e      | S1     | 434               | 2.85      | 0.0412     | HOMO→LUMO (0.70)                  | LC/MLCT    |
|         | S2     | 398               | 3.12      | 0.0952     | HOMO→LUMO+1 (0.68)                | LLCT/ILCT  |
|         | S4     | 353               | 3.51      | 0.1646     | HOMO-1→LUMO (0.62)                | MLCT/LLCT  |
| 2a      | S1     | 469               | 2.64      | 0.0762     | HOMO→LUMO (0.70)                  | LC/MLCT    |
|         | S2     | 435               | 3.85      | 0.1002     | HOMO→LUMO+1 (0.69)                | LLCT/ILCT  |
|         | S3     | 366               | 3.39      | 0.0595     | HOMO-1→LUMO (0.65)                | MLCT/LLCT  |
| 2b      | S1     | 470               | 2.64      | 0.0723     | HOMO→LUMO (0.70)                  | LC/MLCT    |
|         | S2     | 435               | 3.85      | 0.0928     | HOMO→LUMO+1 (0.69)                | LLCT/ILCT  |
|         | S3     | 367               | 3.38      | 0.0540     | HOMO-1→LUMO (0.66)                | MLCT/LLCT  |
| 2c      | S1     | 469               | 2.65      | 0.0681     | HOMO→LUMO (0.70)                  | LC/MLCT    |
|         | S2     | 434               | 3.86      | 0.0923     | HOMO→LUMO+1 (0.69)                | LLCT/ILCT  |
|         | S3     | 365               | 3.39      | 0.0543     | HOMO-1→LUMO (0.65)                | MLCT/LLCT  |
| 2d      | S1     | 478               | 2.60      | 0.0785     | HOMO→LUMO (0.70)                  | LC/MLCT    |
|         | S2     | 436               | 3.84      | 0.0850     | HOMO→LUMO+1 (0.69)                | LLCT/ILCT  |
|         | S3     | 369               | 3.36      | 0.0629     | HOMO-1→LUMO (0.67)                | MLCT/LLCT  |
| 2e      | S1     | 478               | 2.59      | 0.0652     | HOMO→LUMO (0.70)                  | LC/MLCT    |
|         | S2     | 426               | 2.90      | 0.0835     | HOMO→LUMO+1 (0.69)                | LLCT/ILCT  |
|         | S3     | 372               | 3.34      | 0.0723     | HOMO-1→LUMO (0.68)                | MLCT/LLCT  |

**Table S4** HOMO and LUMO distributions of **2a-2e** at the triplet states.

| Complex | HOMO                                                                                | LUMO                                                                                  |
|---------|-------------------------------------------------------------------------------------|---------------------------------------------------------------------------------------|
| 2a      | 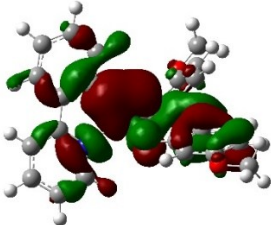   |    |
| 2b      |    |    |
| 2c      |   |   |
| 2d      |  |  |
| 2e      |  |  |

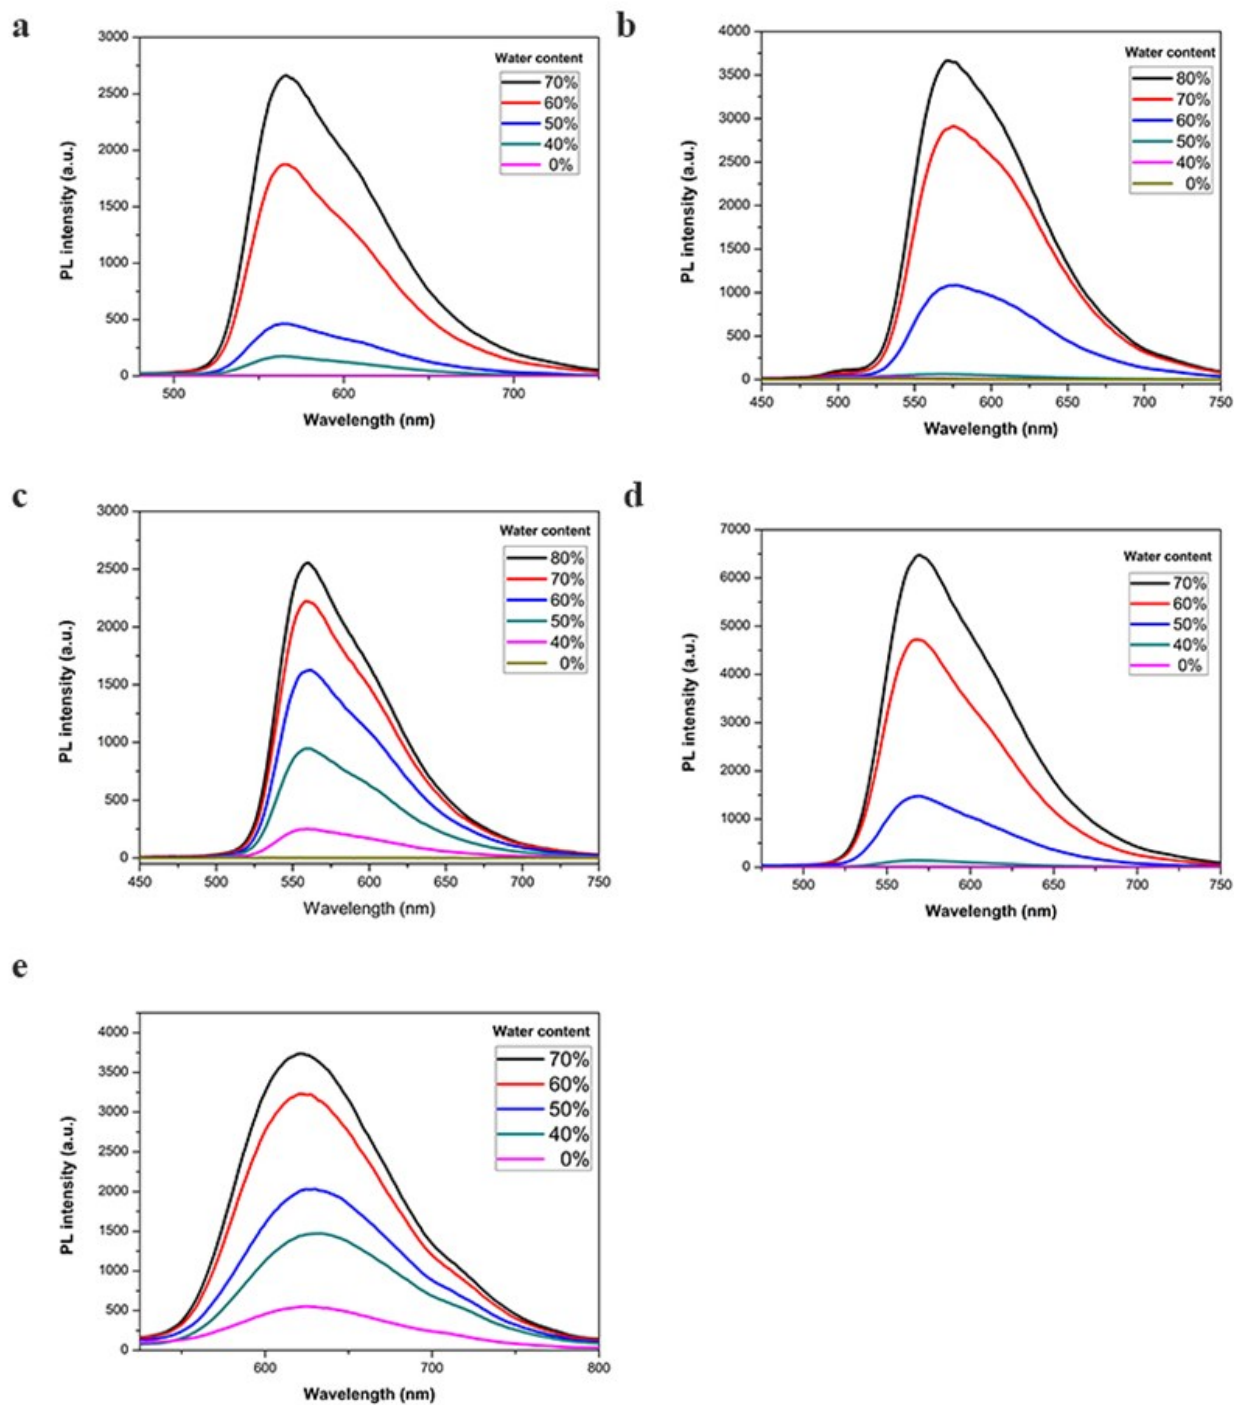

**Fig. S4.** Photoluminescence spectra of platinum complexes of **1a** (a), **1b** (b), **1c** (c), **1d** (d), **1e** (e) in THF–water mixtures.

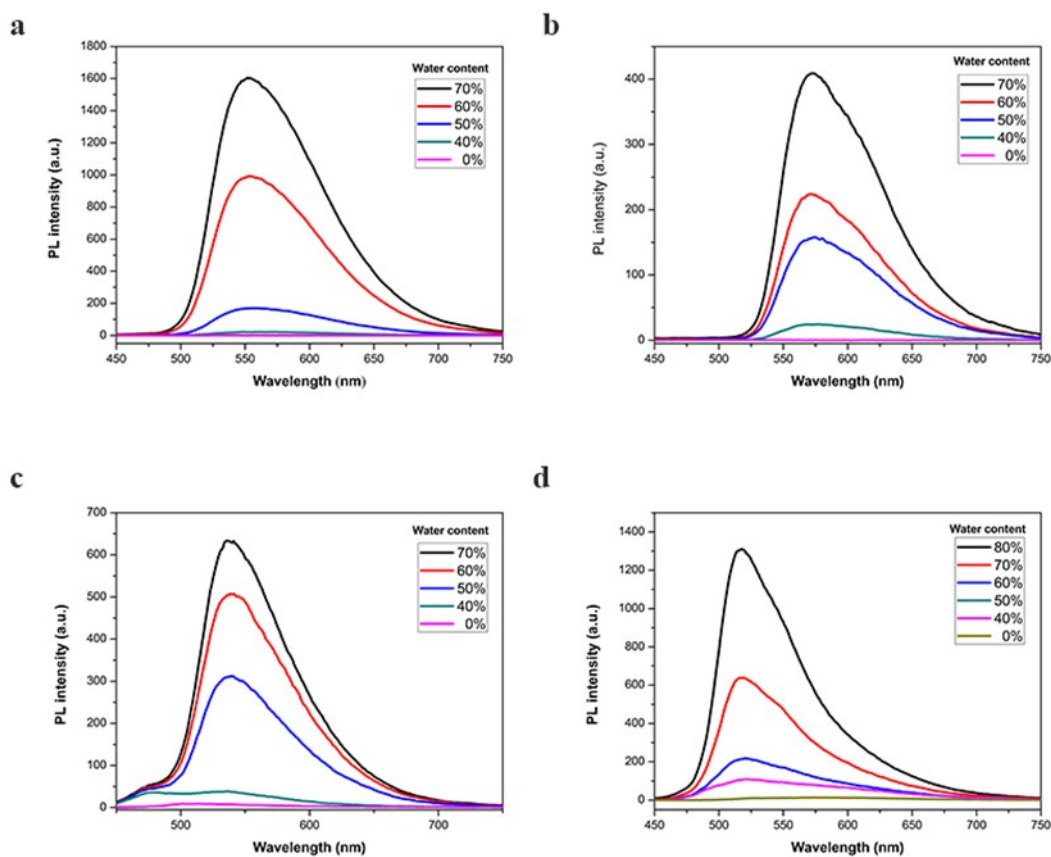

**Fig. S5.** Photoluminescence spectra of platinum complexes of **2a** (a), **2b** (b), **2d** (c), **2e** (d) in THF–water mixtures.

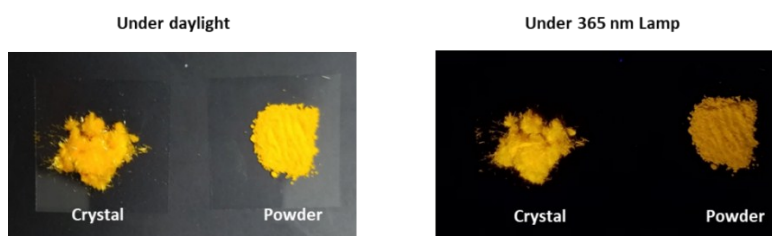

**Fig. S6.** Photoluminescence images of complex **1c** before and after grinding under daylight and 365 nm lamp, respectively.

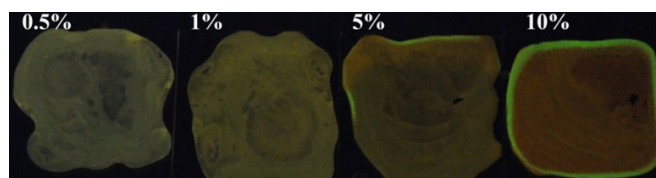

**Fig. S7.** Luminescence photographs of the solid poly(methyl methacrylate) (PMMA) film doped with different contents of **2c**.

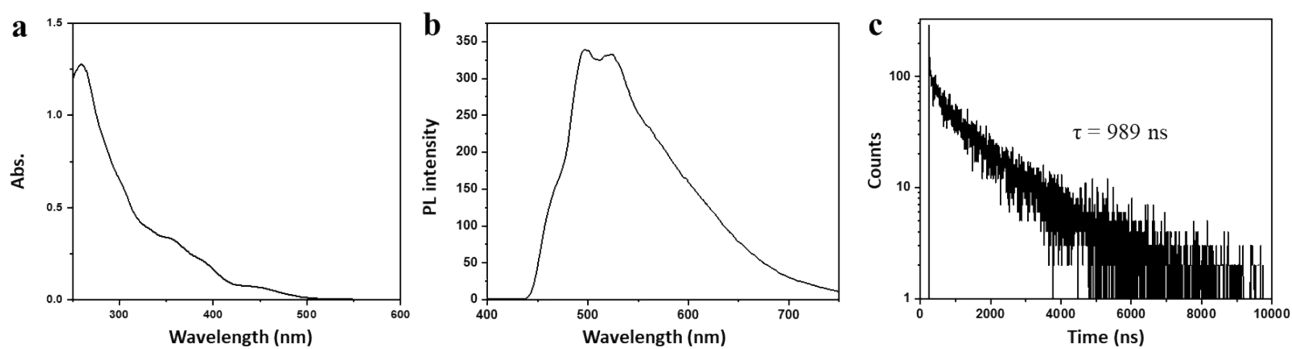

**Fig. S8.** UV-Vis absorption spectrum (a), emission spectrum (b) and experimental luminescence decay curves (c) of **P1** in PBS (pH = 7.4).

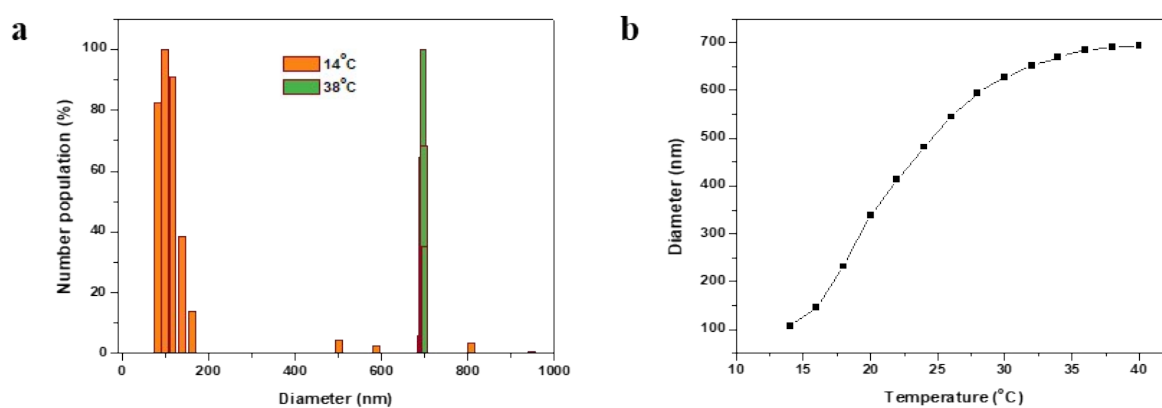

**Fig. S9.** The hydrodynamic diameters of **P1** (0.01 w/v%, pH = 7.4) at different temperatures (a); A correlation between the temperatures and the micelles sizes of the **P1** as examined by DLS measurements (b).

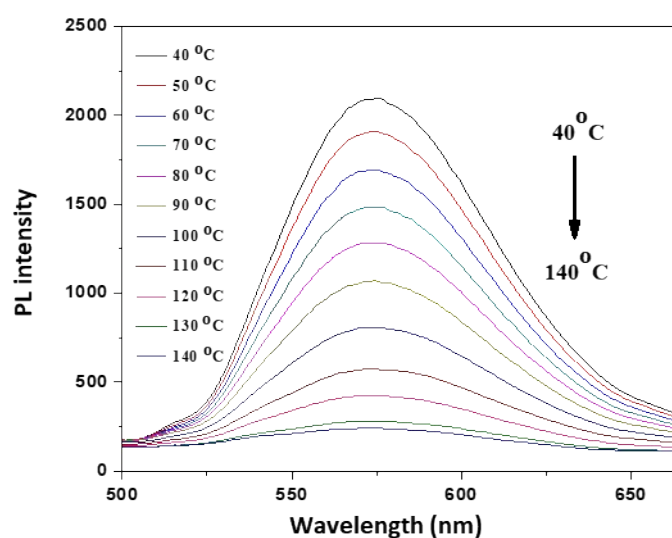

**Fig. S10.** Emission spectra of **1d** in solid-state at various temperatures.

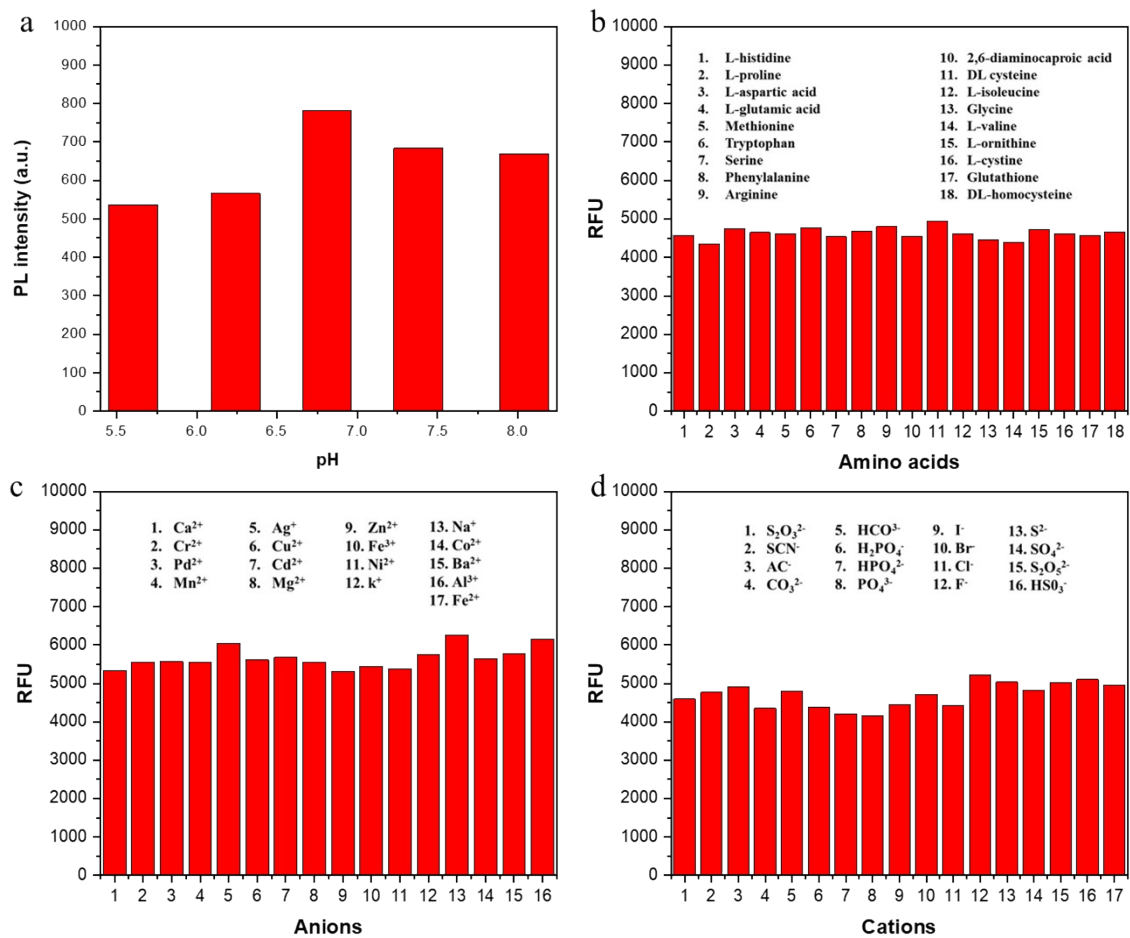

**Fig. S11.** Stability of P1 (0.01 w/v%) in PBS with different pH (a), amino acids (b), anions (c) and cations (d).

**Table S5.** Crystal data and structure refinement for **1e**-cif.

| Structural parameters                  | 1e                                                                 |
|----------------------------------------|--------------------------------------------------------------------|
| Empirical formula                      | C <sub>24</sub> H <sub>13</sub> F <sub>5</sub> N <sub>2</sub> O Pt |
| F <sub>w</sub>                         | 635.45                                                             |
| crystal system                         | orthorhombic                                                       |
| space                                  | P b c a (61)                                                       |
| crystal size (mm <sup>3</sup> )        | 0.12×0.11 × 0.10                                                   |
| a, Å                                   | 15.764(3)                                                          |
| b, Å                                   | 11.846(2)                                                          |
| c, Å                                   | 22.623(4)                                                          |
| α, deg                                 | 90                                                                 |
| β, deg                                 | 90                                                                 |
| γ, deg                                 | 90                                                                 |
| V, Å <sup>3</sup>                      | 4224.63(130)                                                       |
| Z                                      | 8                                                                  |
| calculated density, g/cm <sup>-3</sup> | 1.99805 g/cm <sup>3</sup>                                          |
| μ, mm <sup>-1</sup>                    | 6.706                                                              |
| F (000)                                | 2416.0                                                             |
| final R1 [I>2σ(I)]                     | 0.0282                                                             |
| wR2 [I>2σ(I)]                          | 0.0649                                                             |
| R1 (all data)                          | 0.0519                                                             |
| wR2 (all data)                         | 0.0760                                                             |
| GOF on F <sup>2</sup>                  | 0.975                                                              |
